# Supplementary material
Source: Research Square preprint supplement (doi:10.21203/rs.3.rs-10003720/v1)
Supplement: Supplementary file 1 [file 5cc705471b7b8835e4a95b1b.xlsx]

## Sheet: Coding Dimensions
Category Type	Category	Sub-Cat Level	Dimensions	Data Entry	#	%
	Meta Data		Year
			Country
Functional - how is it used where and by whom?	Decision Dimensions	Core Triaging Task	General triage	Cat	14	0.56
			Subproblem triage (e.g., Sepsis risk flag)		10	0.4
			Next step identification (e.g., need for MRI)		1	0.04
		Decision Outcome	E.g., mortality predicition, urgency score etc.	Str		0
		Outcome data type	Binary (e.g. Patient needs MRI: yes/no)	Cat	3	0.12
			Categorical (e.g., possibly acute diagnosis)		1	0.04
		(displayed)	Ordinal (ranked categories e.g. MTS)		14	0.56
			Continous (inlc. Risk scores) : (e.g. Risk score between 0 and 1)		7	0.28
		Human Oversight	Human decision: Human is supposed to interpret the data and infer their own decision from it.	Cat	22	0.88
			Active approval: Tool proposes a decision that humans actively decline or accept		2	0.08
			Reactive approval: Humans monitor decisions made/ are informed and can intervene		0	0
			Automatic decision: Automatic decisions are implemented without human oversight		1	0.04
		Actionability level	Data (e.g., 67% risk score)	Binary/ String	10	0.4
			Information (e.g., 35% of similar patients require an intervention)		3	0.12
			Recommendation (e.g., send patient to head scan in next 30 min)		11	0.44
			Automated decision (e.g., patients are directly registered for head scan)		1	0.04
	Display Dimensions	Output Representation	Number e.g., sepsis probability 87%	Binary	13	0.52
			Visual/ Graphical Marker e.g.,E.g., red patient = immediate need of care	Binary	16	0.64
			Audio e.g., a sound with the alert		0	0
			Text e.g. "this patient requires a head CT"	Binary	17	0.68
		Information Mode	Push = system is active, as it decides if and when the prediction is shown (e.g., alert for high-risk patients only (Gameiro et al., 2020))	Cat	3	0.12
			Static = both are passive as predictions are always shown (e.g., standard in patient overview)		9	0.36
			Pull = user is active, seeks out information (e.g., info button, request to run model, stand-alone system …)		11	0.44
		Medium/ Integration	e.g., Web-based, in data entry system, …	String		0
		Additional Info	Meta data (e.g., model type, features used)	Str	13	0.52
			System Performance (e.g., population accuracy)		3	0.12
			Explainability (e.g., most important features)		11	0.44
			Uncertainty (e.g. Confidence intervalls)		2	0.08
			Additional info (e.g., resource availability)		7	0.28
	Target Group		All Patients	Cat/ String	15	0.6
			Subgroup e.g., “patients presenting with XYZ”		10	0.4
	Input Data	Data Sources	Historic (EHR) data from previous visits	Str	2	0.08
			Pre-hospital data regarding the same complaint e.g., from EMT	Str	0	0
			At triage e.g., questions and vitals taken at triaging	Str	25	1
		Data Types	Tabular	Binary	23	0.92
			Speech/ text	Binary	6	0.24
			Image	Binary	0	0
			Naming all features	Str		0
Processual - Who was it designed, evaluated and implemented?	System State	Maturity State	Concept Proposal: Mere discussion of how it could look, no users involved	Cat	1	0.04
			Feasibility/ Prototype: Technical feasibility is tested, no users involved		12	0.48
			Usability Test: Small number of users get access in a research setting, not used on real patients		3	0.12
			Clinical test: Tool is provided to a limited number of clinicians in research setting to be used on real patients but not yet part of routine care		5	0.2
			Deployed: Use on real patients in a routine care process		4	0.16
		Evaluation Dimensions	ML Metrik	Str, num	21	0.84
			Cost	Str, num	3	0.12
			Clinical benefit	Str, num	12	0.48
			Time Saving		4	0.16
	Design Process		Which disciplines/roles were involved?	Str	25	1
			Was there interface/ usability testing? If so, what kind (e.g., qualitative interviews, questionnaires, AB-tests)?	Str	25	1
			What other considerations are named? (Legal and data ethics, trust, ...)	Str	25	1
	User education/ communication		E.g., time and form of learning, (Expected) level of accuracy, Uncertainty/ Robustness, Risk and bias, Legal and ethical liability	Str	25	1

## Sheet: Results
	Meta Data										>																																	Design Process
	Paper Info										Decision Dimensions				Display Dimensions													Target Group		Input Data									System State					Process Details
	#	Sys. Name	Title	Authors	Year	Doi	Deploy Country	Model Dev Country	Additional Sources	Contact	Core Triaging Task	Decision Outcome	Outcome data type	Human Oversight	Output Representation					Information Mode	Medium/ Integration	Highest Actionability level	Additional Info					Target Group	Subgroup	Data Sources				Data Types				Commercial Tool	Maturity State	Evaluation Dimensions				Roles	Testing	Considerations	User education
															Number	Visual/ Graphical	Audio	Text	# output types				Model meta data	Performance	Explainability	Uncertainty	Add. info			Historic	Pre-hospital	At Triage	During Stay	Tabular	Speech/ text	Image	Features			ML Metrik	Cost	Clinical benefit	Time Saving
	1	MLASA	Real-time machine learning-assisted sepsis alert enhances the timeliness of antibiotic administration and diagnostic accuracy in emergency department patients with sepsis: a cluster-randomized trial	Kijpaisalratana, Norawit; Saoraya, Jutamas; Nhuboonkaew, Padcha; Vongkulbhisan, Komsanti; Musikatavorn, Khrongwong	2024	10.1007/s11739-024-03535-5	Thailand	Thailand	https://doi.org/10.1016/j.ijmedinf.2022.104689	Contacted to ask for permission to use the screenshot after the end of analysis, received a screenshot of the new version of the system which was not included	Subproblem triage (e.g., Sepsis risk flag)	Sepsis risk	Binary (e.g. Patient needs MRI: yes/no)	Human decision: Human is supposed to interpret the data and infer their own decision from it.	0	1	0	0	1	Static = both are passive as predictions are always shown (e.g., standard in patient overview)	On triaging patient overview, EHR	Data (e.g., 67% risk score)	0	0	0	0	Alert changes to yellow when care has been initiated.	All Patients	0	0	0	1	0	1	1	0	vital signs (e.g., body temperature, systolic blood pressure, pulse, and respiratory rate), age, sex, Emergency Severity Index (ESI) [21], mode of arrival, and chief complaints of the patients as free text	0	Clinical test: Tool is provided to a limited number of clinicians in research setting to be used on real patients but not yet part of routine care	AUC 0.93, sensitivity 87%, and specificity 87% for sepsis identification	0	patients who received antibiotics within 1 and 3 h = faster triage-to-antibiotic (TTA) time but no lower mortality secondary: [30-day mortality, length-of-stay, antibiotics <3h]	0	All Authors: Medical department (incl. Emergency Medicine)	0	"feature interpretability" in model development	"all treating teams were informed of the operational workflow" at the beginning of each cluster interval.
	2	0	Prognostic clinical decision support for pneumonia in the emergency department: A randomized trial	Williams, Derek J.; Nian, Hui; Suresh, Srinivasan; Slagle, Jason; Gradwohl, Stephen; Johnson, Jakobi; Stassun, Justine; Reale, Carrie; Just, Shari L.; Rixe, Nancy S.; Beebe, Russ; Arnold, Donald H.; Turer, Robert W.; Antoon, James W.; Sartori, Laura F.; Freundlich, Robert E.; Grijalva, Carlos G.; Smith, Joshua C.; Weitkamp, Asli O.; Weinger, Matthew B.; Zhu, Yuwei; Martin, Judith M.	2024	10.1002/jhm.13391	USA	USA	https://doi.org/10.1542/peds.2016-1019	0	Subproblem triage (e.g., Sepsis risk flag)	Pneumonia severity / in-hospital outcome risk	Continous (inlc. Risk scores) : (e.g. Risk score between 0 and 1)	Human decision: Human is supposed to interpret the data and infer their own decision from it.	1	1	0	0	2	Static = both are passive as predictions are always shown (e.g., standard in patient overview)	custom user interface, EHR via SMART-on-FHIR standard	Information (e.g., 35% of similar patients require an intervention)	model inputs, variable timestamps	0	variable contributions	0	0	Subgroup e.g., “patients presenting with XYZ”	children (6mo to <18 y/o) with clinician-confirmed pneumonia	0	0	1	0	1	0	0	age, sex, race temperature, heart and respiratory rates, systolic blood pressure, PF ratio, and white blood cell count	0	Clinical test: Tool is provided to a limited number of clinicians in research setting to be used on real patients but not yet part of routine care	C-Index 0.78 (0.76–0.80)	0	primary: [inappropriate disposition bidirectional (outpatient, inpatient, icu)], secondary: [length of stay, 30-day mortality, hospitalization, ED-revisit]	Correct disposition avoiding missing current or deteriorating effects, as defined by various indicators	Authors: Medical institutions. Mentions: Clinicians.	observations, interviews, and usability testing with ED clinicians, checked how often the clinician confirmed adequacy, user perspectives grounded in the five rights of CDS (right information, right person, right time, right format, and right channel) using Likert scales and open‐ended responses. Suggestions to enhance the tool and general opinions regarding use of CDS and pragmatic research with…	Give three sources about design principles, name efficiency, transparency, and minimal workflow disruption, Iterative discussions determined the content, timing, and functionality	Trial awareness and education was provided in multiple formats to ED faculty and staff and pediatric and ED resident physicians via administrative meetings and educational conferences, email, and ad hoc one‐on‐one discussions in the clinical setting. Study personnel and clinician‐champions remained engaged with ED providers throughout the tria; no specific CDS focused education
	3	TriageGO	Enhancing Emergency Department Triage Equity With Artificial Intelligence: Outcomes From a Multisite Implementation.	Jeremiah S Hinson; Scott R Levin; Benjamin D Steinhart; Christopher Chmura; Rohit B Sangal; Arjun K Venkatesh; R Andrew Taylor	2025	10.1016/j.annemergmed.2024.10.014	USA	USA	https://www.radiometeramerica.com/en-us/products/clinical-intelligence/triagego https://doi.org/10.1016/j.annemergmed.2017.08.005 last accessed 05.01.26https://www.radiometeramerica.com/en-us/products/clinical-intelligence/triagego, Additional Papers with description	0	General triage	Risk of critical care / inpatient care / emergent procedures	Ordinal (ranked categories e.g. MTS)	Human decision: Human is supposed to interpret the data and infer their own decision from it.	1	0	0	1	2	Static = both are passive as predictions are always shown (e.g., standard in patient overview)	within existing electronic health record workflow	Recommendation (e.g., send patient to head scan in next 30 min)	0	0	"Brief explanations of machine learning logic."	0	0	All Patients	adult patients (>= 18)	0	0	1	0	1	0	0	age, sex, vital signs, chief complaint (dropdown), arrival mode, comorbidities	1	Deployed: Use on real patients in a routine care process	high-severity designation for critical illness increased from 78.9% to 83.1%, whereas specificity simultaneously increased from 74.3% to 76.8%, most improvement for beforehand underserved groups (POC)	0	primary: [triage distribution], secondary:[hospitalization, ICU admission, in-hospital death]	0	Authors: Medical departments (incl. Emergency Medicine), Biomedical Informatics & Data Science, Company	0	0	0
	4	0	A Computer-Assisted System for Early Mortality Risk Prediction in Patients with Traumatic Brain Injury Using Artificial Intelligence Algorithms in Emergency Room Triage.	Kuan-Chi Tu; Tee-Tau Eric Nyam; Che-Chuan Wang; Nai-Ching Chen; Kuo-Tai Chen; Chia-Jung Chen; Chung-Feng Liu; Jinn-Rung Kuo	2022	10.3390/brainsci12050612	Taiwan	Taiwan	0	0	Subproblem triage (e.g., Sepsis risk flag)	TBI mortality risk	Continous (inlc. Risk scores) : (e.g. Risk score between 0 and 1)	Human decision: Human is supposed to interpret the data and infer their own decision from it.	1	1	0	0	2	Pull = user is active, seeks out information (e.g., info button, request to run model, stand-alone system …)	Web-based, integrated with existing emergency triage system.	Data (e.g., 67% risk score)	PID, patient name, model description, features and feature values	AUC	0	0	0	Subgroup e.g., “patients presenting with XYZ”	Patients suspected with traumatic brain injury	0	0	1	0	1	0	0	age, gender, body mass index, TTAS, heart rate, body temperature, respiratory rate, GCS, left and right pupil size, and light reflex	0	Feasibility/ Prototype: Technical feasibility is tested, no users involved	AUC 0.926 (0.901–0.950), evaluate on 200 newer patients at sensitivity (100%), specificity (84.3%), accuracy (84.5%), PPV (0.088), and NPV (1.0)	0	"quick and early mortality prediction" for deciding "conservative or aggressive treatment"	0	Authors: Neurosurgery, Emergency Medicine, Nursing, Information Systems, Medical Research Mentioned: Neurosurgical experts	0	0	0
	5	Klinik Access	Diagnostic Performance, Triage Safety, and Usability of a Clinical Decision Support System Within a University Hospital Emergency Department: Algorithm Performance and Usability Study.	Juhani Määttä; Rony Lindell; Nick Hayward; Susanna Martikainen; Katri Honkanen; Matias Inkala; Petteri Hirvonen; Tero J Martikainen	2023	10.2196/46760	Finland	Finland	https://klinikhealthcaresolutions.com/solutions/0	Virtual Demo with Kristiaan van Driem from Klinik Healthcare Solutions on 14 Nov. 2025 with SB, PR, KZ	General triage	Triage level and differential diagnosis probabilities	Ordinal (ranked categories e.g. MTS)	Human decision: Human is supposed to interpret the data and infer their own decision from it.	0	1	0	1	2	Pull = user is active, seeks out information (e.g., info button, request to run model, stand-alone system …)	Not integrated so far, Web-based	Data (e.g., 67% risk score)	Age, sex, symptoms [present, severity, not present], symptom duration.	0	Severity symptoms	0	0	All Patients	Voluntary inclusion of patients that were not in need of immediate care, adult (>= 18) patients	0	0	1	0	1	0	0	demographics, history, and symptom-related factors, location of complaint	1	Clinical test: Tool is provided to a limited number of clinicians in research setting to be used on real patients but not yet part of routine care	Triage: mean sensitivities were 85% for urgent cases and 19% for nonurgent cases, Diff. Diagnosis: 45.5% (97/213) exact match accuracy and 12.7% (27/213) close match accuracy for differential diagnosis	0	0	0	Authors: Company, Health Management, Emergency Care	0	Interview: Symptom led	0
	6	0	Interpretable Deep Learning System for Identifying Critical Patients Through the Prediction of Triage Level, Hospitalization, and Length of Stay: Prospective Study.	Yu-Ting Lin; Yuan-Xiang Deng; Chu-Lin Tsai; Chien-Hua Huang; Li-Chen Fu	2024	10.2196/48862	Taiwan	Taiwan	0	0	General triage	Triage level, hospitalization, and length of stay	Ordinal (ranked categories e.g. MTS)	Human decision: Human is supposed to interpret the data and infer their own decision from it.	1	0	0	1	2	0	not integrated	Recommendation (e.g., send patient to head scan in next 30 min)	input features	0	Variable contribution scores for structural features, token attention scores for text	0	0	All Patients	adult patients (>= 20)	0	0	1	0	1	1	0	age, sex, sys_bp, dia_bp, pulse, spO2, resp_rate, temperature, "acute changes before entering ED", fever(binary), pain score, GCS-(E/V/M), major diseases, admission count, "judgement code", arrival time, visits in 24h, arrival mode, work accident(binary), on way to work before accident(binary), text[chief complaint, judgement description)	0	Feasibility/ Prototype: Technical feasibility is tested, no users involved	Accuracy: 0.633, Precision 0.686, Recall 0.633, f1 0.65	0	0	0	Authors: Computer Science, Emergency Medicine	"Before the system is officially launched, we planned a field test to ensure that the system can achieve promising performance in the real world."	inference time	0
	7	TriageGO	Accelerated Chest Pain Treatment With Artificial Intelligence-Informed, Risk-Driven Triage.	Jeremiah S Hinson; R Andrew Taylor; Arjun Venkatesh; Benjamin D Steinhart; Christopher Chmura; Rohit B Sangal; Scott R Levin	2024	10.1001/jamainternmed.2024.3219	USA	USA	https://www.radiometeramerica.com/en-us/products/clinical-intelligence/triagego https://doi.org/10.1016/j.annemergmed.2017.08.005 https://cdn.jamanetwork.com/ama/content_public/journal/intemed/939451/ild240016supp1_prod_1724793971.66359.pdf?Expires=1771231207&Signature=H8-flNB1ReVZECV7hdJCPa~2WZACWl2chq8OzZYxl1F79rpfYSiOBtmtx~NwFhJVlRKbHKt~ECBREXQ5ost~X0PGiwNlsyu2g~o0jFVBho2gciStELLpXWDxFFIege2u3…	0	General triage	Patient acuity level (1–5)	Ordinal (ranked categories e.g. MTS)	Human decision: Human is supposed to interpret the data and infer their own decision from it.	1	0	0	1	2	Static = both are passive as predictions are always shown (e.g., standard in patient overview)	within existing electronic health record workflow	Recommendation (e.g., send patient to head scan in next 30 min)	0	0	Explanation of recomendation	0	0	Subgroup e.g., “patients presenting with XYZ”	patients with a chief complaint of chest pain	0	0	1	0	1	0	0	demographics, arrival mode, vital signs, chief complaints, and active medical problems	1	Deployed: Use on real patients in a routine care process	0	0	time to procedure (arrival to procedure start time), and rates of hospitalization, intensive care unit (ICU) admission, emergency surgery, and 30-day mortality, wider distribution of patients with chest pain across ED triage levels	transition to inpatient care	Authors: (Emergency) Medicine, Engineering in Healthcare, Biomedical Informatics & Data Science, Company	0	0	0
	8	SAFE WAIT	Evaluation of a real time machine learning sepsis risk algorithm for Emergency Department waiting rooms (SAFE-WAIT)	Kabil G., Frost S.A., Wang A.P., Hoang M.T., Chandru P., Moscova M., Shetty A.	2025	10.1101/2025.06.23.25330154	Australia	Australia	osf.io/z8dyj_v1	0	Subproblem triage (e.g., Sepsis risk flag)	Sepsis / septic shock risk	Ordinal (ranked categories e.g. MTS)	Human decision: Human is supposed to interpret the data and infer their own decision from it.	0	1	0	0	1	Pull = user is active, seeks out information (e.g., info button, request to run model, stand-alone system …)	within existing electronic health record workflow	Data (e.g., 67% risk score)	Triage category, length of stay, age, name, reason for admission, vitals done[boolean], bitals within range[boolean], bloodgas ordered[boolean], antibiotics ordered[boolean].	0	0	0	0	All Patients	In waiting room >16 years	0	0	1	0	1	0	0	vital signs, age, and gender,	0	Clinical test: Tool is provided to a limited number of clinicians in research setting to be used on real patients but not yet part of routine care	sensitivity, specificity, PPV, NPV, accuracy	0	time to physician review, time to first dose of antibiotics, ICU admission and allcause in-hospital mortality rates	0	Authors: Emergency Department, Government (Ministry of Health)	0	0	educational and training sessions conducted by the clinical model development team and multidisciplinary group of emergency clinicians., triage and waiting room support nurse were primarily trained to review the waiting room risk dashboard regularly with advice to monitor high-risk patients closely (repeated vitals measurement), initiate earlier investigations e.g. lactate measurements or seek ea…
	9	IntelTriage	Functional and non-functional requirements of a smart triage system for Emergency Departments: the case of IntelTriage project	A. Billis; E. Logaras; M. Zouka; N. Karanasiou; A. Fourlis; P. Nicopolitidis; P. Lagakis; J. Gialelis; D. Kallergis; G. I. Papadimitriou; C. Douligeris; T. S. Papavramidis; M. Krizea; P. D. Bamidis	2019	10.1109/SEEDA-CECNSM.2019.8908320	Greece	Greece	0	0	Subproblem triage (e.g., Sepsis risk flag)	Clinical deterioration / abnormality detection	Binary (e.g. Patient needs MRI: yes/no)	Human decision: Human is supposed to interpret the data and infer their own decision from it.	0	1	0	1	2	Push = system is active, as it decides if and when the prediction is shown (e.g., alert for high-risk patients only (Gameiro et al., 2020))	within existing electronic health record workflow	Data (e.g., 67% risk score)	0	0	0	0	Patient location in hospital	Subgroup e.g., “patients presenting with XYZ”	ESI 3 patients	0	0	1	1	1	0	0	ongoing vital signs	0	Concept Proposal: Mere discussion of how it could look, no users involved	0	low power usage	0	0	needs of end-users (hospital, medical and nursing staff and patients). In particular, a series of interviews with medical personnel was carried out, Authors: Medical Physics, Anaesesthesiology & Intesive Care, Commercial party, Informatics, Surgery. Mentions: medical personnel	"Software easy test ability by supporting testing in a given test context"	user acceptance, ease of use, security, scalability, interoperability with other systems, load resiliance, data integrity	0
	10	KATE	The Impact of Cultural Embeddedness on the Implementation of an Artificial Intelligence Program at Triage: A Qualitative Study.	Michael Jordan; Jacob Hauser; Stephanie Cota; Hong Li; Lisa Wolf	2023	10.1177/10436596221129226	USA	USA	https://mednition.com/products/#KATE last accessed 5.01.26https://mednition.com/products/#KATE	Contacted Mednition per email on 8th November, 2025, were allowed to display graphic.	General triage	ESI triage level	Ordinal (ranked categories e.g. MTS)	Active approval: Tool proposes a decision that humans actively decline or accept	1	1	0	1	3	Push = system is active, as it decides if and when the prediction is shown (e.g., alert for high-risk patients only (Gameiro et al., 2020))	within existing electronic health record workflow	Recommendation (e.g., send patient to head scan in next 30 min)	Patient name, age, case description	0	0	Prediction probability distribution	Color coded vitals when outside normal range	All Patients	0	1	0	1	0	1	1	0	Vitals, history, symptoms	1	Usability Test: Small number of users get access in a research setting, not used on real patients	0	0	0	0	no tech in authors -> no tech focus in paper, Authors: Nursing	0	interviews focused on the cultural background of the participant, the patient population, and the impact of cultural awareness, knowledge, skill, and desire on the use of the AI program.	0
	11	0	Implementation of an All-Day Artificial Intelligence-Based Triage System to Accelerate Door-to-Balloon Times.	Yu-Chen Wang; Ke-Wei Chen; Being-Yuah Tsai; Mei-Yao Wu; Po-Hsin Hsieh; Jung-Ting Wei; Edward S C Shih; Yi-Tzone Shiao; Ming-Jing Hwang; Kuan-Cheng Chang	2022	10.1016/j.mayocp.2022.05.014	Taiwan	Taiwan	0	0	Subproblem triage (e.g., Sepsis risk flag)	STEMI detection / risk	Binary (e.g. Patient needs MRI: yes/no)	Active approval: Tool proposes a decision that humans actively decline or accept	0	0	0	1	1	Push = system is active, as it decides if and when the prediction is shown (e.g., alert for high-risk patients only (Gameiro et al., 2020))	Within System: From ECG diretly to doctors mobile phones	Data (e.g., 67% risk score)	0	0	0	0	Link to ECG for patient.	Subgroup e.g., “patients presenting with XYZ”	1) presenting with chest pain, 2) above pre-defined score	0	0	1	0	1	0	0	ECG as time series, 6 chest leads + 6 limb leads	0	Deployed: Use on real patients in a routine care process	AUC = 0.99, recall = 0.977	0	primary:[Door 2 Balloon time], secondary: [Door to ECG time, Cath lab activation time, Door-to-activation time]	0	Authors: Medicine, AI Center for Medical Diagnosis	0	0	0
	12	Automated Triage System	Development of automated triage system for emergency medical service	H. A. Chong; K. B. Gan	2016	10.1109/ICAEES.2016.7888125	Malaysia	Malaysia	0	0	General triage	Triage level (0–5 scale)	Ordinal (ranked categories e.g. MTS)	Human decision: Human is supposed to interpret the data and infer their own decision from it.	0	0	0	1	1	Pull = user is active, seeks out information (e.g., info button, request to run model, stand-alone system …)	not integrated yet, Stand-alone Windows application	Recommendation (e.g., send patient to head scan in next 30 min)	Time of triage, model inputs, patient id	0	0	0	0	All Patients	0	0	0	1	0	1	0	0	vital signs, syndrome and chief complaint	0	Feasibility/ Prototype: Technical feasibility is tested, no users involved	ccuracy of 0.98, OOB error	0	0	Process takes same time as regular triage...	Authors: Electrical & Systems Engineering, no mention of medical involvement	0	0	0
	13	Isabel	Electronic Diagnostic Support in Emergency Physician Triage: Qualitative Study With Thematic Analysis of Interviews.	Matthew Sibbald; Bashayer Abdulla; Amy Keuhl; Geoffrey Norman; Sandra Monteiro; Jonathan Sherbino	2022	10.2196/39234	Canada	Canada	https://www.isabelhealthcare.com/products/isabel-ddx-companion0	0	General triage	Differential diagnosis list	Categorical (e.g., possibly acute diagnosis)	Human decision: Human is supposed to interpret the data and infer their own decision from it.	0	1	0	1	2	Static = both are passive as predictions are always shown (e.g., standard in patient overview)	not integrated but mimicked automated access, access via tablet	Information (e.g., 35% of similar patients require an intervention)	0	0	0	0	Option to jump into more info about specific diseases	All Patients	0	0	0	1	0	1	1	0	patient age, gender, travel history, and symptoms	1	Usability Test: Small number of users get access in a research setting, not used on real patients	0	0	Qualitative evaluation / physician opinion on potential benifit.	0	Authors: Medicine, Health Research Methods, Evidence & Impact	0	Trust, workflow and workload, usability and usefulness, bias	0
	14	Smart Triage	Improving pediatric care in Uganda with a digital platform and quality improvement initiative: A retrospective review of Smart Triage + QI.	Rebecca Goertzen; Yashodani Pillay; James Karugaba; Ivan Aine Aye Ishebukara; Ahmad Asdo; Dustin Dunsmuir; Justine Behan; Charly Huxford; Stefanie K Novakowski; Fredson Tusingwire; Ronald Kasyaba; Gloria Kakuru; John Khisa; Stephen Businge; Mike Kyewalyanga; Niranjan Kissoon; J Mark Ansermino	2025	10.1371/journal.pone.0329369	Uganda	Canada / Uganda	https://doi.org/10.3389/fped.2022.976870	0	General triage	Urgency category / admission risk	Ordinal (ranked categories e.g. MTS)	Automatic decision: Automatic decisions are implemented without human oversight	0	1	0	0	1	Pull = user is active, seeks out information (e.g., info button, request to run model, stand-alone system …)	Data is pulled within existing electronic health record workflow and dashboard is webpage	Automated decision (e.g., patients are directly registered for head scan)	Patient treatment info, patient assessment status.	0	0	0	Patient location	Subgroup e.g., “patients presenting with XYZ”	Children up to 17 years	0	0	1	0	1	0	0	Transformed spO2, pulse, temp, mid-upper arm circumference, age, parent concern[bool] - "Do you think that your child needs admission because they are sicker than they have been in the past?", difficulty breathing[bool], oedema[bool], pallor[bool]	0	Deployed: Use on real patients in a routine care process	0	0	median time to IV antimicrobials 77.6 to 53.6 minutes and number of high-urgency patients increased by 6.2 patients per month, mortality rates 5.1% in August 2018 to 2.6% in October 2023 and admission rates, Triaging rate, time-to-antimicrobials, reduce waiting times	OPD workflows were adjusted to make triaging and treatment administration more efficient	Authors: General Medical, Anaesthesiology & Pharmacology, Pediatrics	0	key drivers: standardized training processes for OPD staff, OPD workflow efficiency, and QI Team communication, fall-back options for overcrowding, use data for data.driven culture	training session with 29 staff members, Train-the-trainer program with nine incl. Lab, nurses, physicians and records staff, three ours per day over three years, manual provided, bi-annual triage refresher training for existing OPD staff and regular orientation of new OPD staff
	15	0	Machine learning-based suggestion for critical interventions in the management of potentially severe conditioned patients in emergency department triage.	Hansol Chang; Jae Yong Yu; Sunyoung Yoon; Taerim Kim; Won Chul Cha	2022	10.1038/s41598-022-14422-4	South Korea	South Korea	0	0	Next step identification (e.g., need for MRI)	Need for critical interventions	Continous (inlc. Risk scores) : (e.g. Risk score between 0 and 1)	Human decision: Human is supposed to interpret the data and infer their own decision from it.	1	1	0	0	2	Static = both are passive as predictions are always shown (e.g., standard in patient overview)	within existing electronic health record workflow	Recommendation (e.g., send patient to head scan in next 30 min)	Training set size.	AUROC per outcome	0	0	0	All Patients	only adult	0	0	1	0	1	0	0	body temp, bp_sys, bp_dia, resp_rate, pulse, spO2, KTAS, mode of arrival, mental status (measured).	0	Feasibility/ Prototype: Technical feasibility is tested, no users involved	AUROC of predictions of need was 0.913, 0.909, 0.962, 0.945, 0.920, and 0.899 for A-line insertion, oxygen therapy, HFNC, intubation, MTP, and inotropes, respectively.	0	0	0	Authors: Emergency Medicine, Digital Health	0	Early predictions with concrete recommendations " by suggesting interventions directly and separately, this model may support clinician decision and action more in specific way	0
	16	TEWS	Development and validation of a transformer model-based early warning score for real-time prediction of adverse outcomes in the emergency department.	Hansol Chang; Jong Eun Park; Daehwan Lee; Kiwon Lee; Se Yong Jekal; Ki Tae Moon; Sejin Heo; Doyeop Kim; Gun Tak Lee; Sung Yeon Hwang; Won Chul Cha; Wonhee Kim; Tae Ho Lim; Tae Gun Shin	2025	10.1038/s41598-025-07511-7	South Korea	South Korea	0	0	Subproblem triage (e.g., Sepsis risk flag)	Risk of adverse events (e.g., ICU admission, cardiac arrest)	Ordinal (ranked categories e.g. MTS)	Human decision: Human is supposed to interpret the data and infer their own decision from it.	1	1	0	1	3	Static = both are passive as predictions are always shown (e.g., standard in patient overview)	within existing electronic health record	Data (e.g., 67% risk score)	Training set metadata.	0	Shows "factor" variables for prediction.	0	0	All Patients	0	0	0	1	1	1	0	0	vital signs (systolic blood pressure, diastolic blood pressure, heart rate, respiratory rate, body temperature, and peripheral oxygen saturation) and laboratory values (hemoglobin, blood urea nitrogen, sodium, potassium, lactate, arterial pH, and bicarbonate)	0	Feasibility/ Prototype: Technical feasibility is tested, no users involved	AUROC values to 0.846–0.911.	Worked on "reducing computing time and effort during operation"	Not measured but "incorporated into quality improvement initiatives to reduce time to blood pressure stabilization in critically ill patients and to expedite antibiotic administration in septic shock" and "further studies are needed"	0	Say "sustained interdisciplinary collaboration and ongoing refinement are essential to ensure clinical value and successful adoption",Authors: Emergency Medicine, Digital Health, Biomedical Informatics	0	Model runtime considered as DL	0
	17	0	AI-Enhanced Speech Recognition in Triage.	Ahmed Elhilali; Vanessa Brügger; Isabelle Tschannen; Wolf Hautz; Gert Krummrey	2025	10.3233/SHTI250213	Switzerland	Switzerland	0	Contacted authors per mail on 26.11.25 and follow-up on 17.12.25, answer on 17.12	General triage	ESI level with CEDIS complaint	Ordinal (ranked categories e.g. MTS)	Human decision: Human is supposed to interpret the data and infer their own decision from it.	0	0	0	1	1	Pull = user is active, seeks out information (e.g., info button, request to run model, stand-alone system …)	not integrated - web application to upload audio data	Recommendation (e.g., send patient to head scan in next 30 min)	0	0	0	0	0	All Patients	0	0	0	1	0	0	1	0	Only upload audio data; Triage converstation -> Triage transcript	1	Feasibility/ Prototype: Technical feasibility is tested, no users involved	Accuracy (+ word error rate for trascription)	0	0	0	Authors: Emergency Medicine, Medical Informatics	0	0	0
	18	0	Triage Performance Across Large Language Models, ChatGPT, and Untrained Doctors in Emergency Medicine: Comparative Study.	Lars Masanneck; Linea Schmidt; Antonia Seifert; Tristan Kölsche; Niklas Huntemann; Robin Jansen; Mohammed Mehsin; Michael Bernhard; Sven G Meuth; Lennert Böhm; Marc Pawlitzki	2024	10.2196/53297	Germany	USA	0	0	General triage	MTS triage category (color-coded)	Ordinal (ranked categories e.g. MTS)	Human decision: Human is supposed to interpret the data and infer their own decision from it.	0	0	0	1	1	Pull = user is active, seeks out information (e.g., info button, request to run model, stand-alone system …)	not integrated, ChatGPT	Recommendation (e.g., send patient to head scan in next 30 min)	0	0	Prompts reasoning.	0	0	All Patients	0	0	0	1	0	0	1	0	Human written text/ vignette that includes Age, Vital signs, conscious state	1	Usability Test: Small number of users get access in a research setting, not used on real patients	Less likely to undertriage then doctors untrained in MTS but overall equally good	0	0	0	Authors: Neurology, Digital Health, Emergency Department	0	0	0
	19	SMASS	Performance of the artificial intelligence-based Swiss medical assessment system versus Manchester triage system in the emergency department: A retrospective analysis.	Gregor Lindner; Svenja Ravioli	2025	10.1016/j.ajem.2025.04.023	Austria	Switzerland	https://www.in4medicine.ch/#kpg_452376 accessed 0	Provider contacted 27.11.25 and follow-up 17.12.25, authors contacted 07.01.26, received response 07.01.26	General triage	Urgency categories (immediate, emergency, same-day, non-urgent)	Ordinal (ranked categories e.g. MTS)	Human decision: Human is supposed to interpret the data and infer their own decision from it.	0	1	0	1	2	Pull = user is active, seeks out information (e.g., info button, request to run model, stand-alone system …)	not integrated so far but integratable	Recommendation (e.g., send patient to head scan in next 30 min)	0	0	Textual explanation	0	0	Subgroup e.g., “patients presenting with XYZ”	Excluded stroke, trauma-related complaints and patients accompanied by pre-hospital emergency medicine physicians	0	0	1	0	1	0	0	sex, age group, pregnant[bool], structured pre-triage questions[breathing, immediate life-treatheting situations, conciousness, cardiovascular complaints, neurological complaints]	1	Feasibility/ Prototype: Technical feasibility is tested, no users involved	Over and undertriaging compared to MTS	0	0	0	Authors: Emergency Medicine	0	0	Provider website states that it can only be used after completing E-Learning, user guide provided by authors per email
	20	0	Construction and evaluation of a triage assessment model for patients with acute non-traumatic chest pain: mixed retrospective and prospective observational study.	Xuan Zhou; Gangren Jian; Yuefang He; Yating Huang; Jie Zhang; Shengfang Wang; Yunxian Wang; Ruofei Zheng	2025	10.1186/s12873-025-01176-1	China	China	https://leixiantu.shinyapps.io/DynNomapp_CP_triage/0	0	Subproblem triage (e.g., Sepsis risk flag)	High-risk chest pain prediction	Continous (inlc. Risk scores) : (e.g. Risk score between 0 and 1)	Human decision: Human is supposed to interpret the data and infer their own decision from it.	1	1	0	0	2	Pull = user is active, seeks out information (e.g., info button, request to run model, stand-alone system …)	not integrated - webpage with manual input	Data (e.g., 67% risk score)	input features, model configuration	R2	Feature coefficients	confidence interval	0	Subgroup e.g., “patients presenting with XYZ”	>18 years main complain "Chest discomfort" onset <24h and not trauma-related	0	0	1	0	1	0	0	28 potential predictors, incl. Demographic, risk factors, ed manifestation incl. Vitals, Conscious state, initial evaluation including Electrogardiogram findings (normal, non-specific abnormalities, ischemic changes), history of drug theraphy	0	Feasibility/ Prototype: Technical feasibility is tested, no users involved	AUC = 0.919	"more cost-effective than HEART pathway" but no reasoning why or how	0	0	Authors: Nursing, Emergency Department / Emergency Medicine	None but named in limitations: "online tools also need to conduct a user-centered evaluation, and further adjust and optimize the tools from the perspective of use proficiency and interface aesthetics"	"simple use and intuitive results"	"triage professionals need to be trained"
	21	0	Medical emergency department triage data processing using a machine-learning solution.	Andreea Vântu; Anca Vasilescu; Alexandra Băicoianu	2023	10.1016/j.heliyon.2023.e18402	Romania	Romania	0	Authors contacted per email 27.11, follow-up 17.12, answered 17.12	General triage	ESI triage level (duplicate removed)	Ordinal (ranked categories e.g. MTS)	Human decision: Human is supposed to interpret the data and infer their own decision from it.	0	0	0	1	1	Pull = user is active, seeks out information (e.g., info button, request to run model, stand-alone system …)	not integrated - web application	Recommendation (e.g., send patient to head scan in next 30 min)	0	0	0	0	0	All Patients	adult patients	0	0	1	0	1	0	0	medical history (binary diagnosis options), heart_rate, sys_bp, dia_bp, resp_rate, SpO2, temp, gender, age, arrival mode, previous disposition	0	Feasibility/ Prototype: Technical feasibility is tested, no users involved	ROC-AUC score per code 0.72%, 0.75%, 0.69%, 0.74%, 0.78%	0	0	0	Authors: Mathematics & Computer Science	0	0	0
	22	xAI-EWS	Explainable artificial intelligence model to predict acute critical illness from electronic health records	Lauritsen S.M., Kristensen M., Olsen M.V., Larsen M.S., Lauritsen K.M., Jørgensen M.J., Lange J., Thiesson B.	2020	10.1038/s41467-020-17431-x	Denmark	Denmark	0	0	Subproblem triage (e.g., Sepsis risk flag)	Critical outcomes (sepsis, AKI, acute lung injury)	Continous (inlc. Risk scores) : (e.g. Risk score between 0 and 1)	Human decision: Human is supposed to interpret the data and infer their own decision from it.	1	1	0	0	2	0	not integrated	Data (e.g., 67% risk score)	relevant features	0	back-propagated feature relevance at different time points.	0	0	All Patients	only adult patients included in study	0	0	1	0	1	0	0	vitals[bp_dia, pusle, resp_rate, SpO2, sys_bp, temp], a lot of lab variables -	0	Feasibility/ Prototype: Technical feasibility is tested, no users involved	AUC 0.88-0.92	0	0	0	Model development was done in an iterative way where results from technical development were continuously discussed with clinicians from an emergency department., Authors: Company, Clinical Medicine, Biomedical Engineering and Informatics, Endocrinology and Internal Medicine, Engineering | Mention: Emergency clinicians	0	"Actionabiliy through explainabilty"	0
	23	0	An Artificial Intelligence Model for Predicting Trauma Mortality Among Emergency Department Patients in South Korea: Retrospective Cohort Study.	Seungseok Lee; Wu Seong Kang; Do Wan Kim; Sang Hyun Seo; Joongsuck Kim; Soon Tak Jeong; Dong Keon Yon; Jinseok Lee	2023	10.2196/49283	South Korea	South Korea	0	0	Subproblem triage (e.g., Sepsis risk flag)	ED mortality / trauma survival	Continous (inlc. Risk scores) : (e.g. Risk score between 0 and 1)	Human decision: Human is supposed to interpret the data and infer their own decision from it.	1	0	0	1	2	Pull = user is active, seeks out information (e.g., info button, request to run model, stand-alone system …)	not integrated, public website	Information (e.g., 35% of similar patients require an intervention)	input features	0	0	0	0	Subgroup e.g., “patients presenting with XYZ”	trauma patients	0	0	1	1	1	0	0	43-921 features age, sex, intentionality, injury, emergent symptom, Alert/Verbal/Painful/Unresponsive (AVPU) scale, Korean Triage and Acuity Scale (KTAS), and vital signs	0	Feasibility/ Prototype: Technical feasibility is tested, no users involved	AUC 0.99	0	0	0	Authors: Biomedical Engineering, Trauma Surgery, Thoracic and Cardiovascular Surgery, Radiology, Physical Medicine and Rehabilitation, Pediatrics, Digital Health	0	say it is not a time consuming process	0
	24	0	Development and validation of a practical machine-learning triage algorithm for the detection of patients in need of critical care in the emergency department.	Yecheng Liu; Jiandong Gao; Jihai Liu; Joseph Harold Walline; Xiaoying Liu; Ting Zhang; Yunyang Wu; Ji Wu; Huadong Zhu; Weiguo Zhu	2021	10.1038/s41598-021-03104-2	China	China	0	0	General triage	Risk of mis-triage	Continous (inlc. Risk scores) : (e.g. Risk score between 0 and 1)	Human decision: Human is supposed to interpret the data and infer their own decision from it.	1	1	0	1	3	Static = both are passive as predictions are always shown (e.g., standard in patient overview)	Not integrated	Data (e.g., 67% risk score)	0	0	SHAP values	0	0	Subgroup e.g., “patients presenting with XYZ”	ETS triage level 3 an 4	0	0	1	0	1	0	0	age, sex, arrival mode, arrival time, triage vital signs (pulse rate, systolic and diastolic blood pressure, respiratory rate, temperature, and oxygen saturation), level of consciousness, chief complaint(s), blood sugar level and visual analogue (pain) scale (VAS)	0	Clinical test: Tool is provided to a limited number of clinicians in research setting to be used on real patients but not yet part of routine care	AUC 0.875	0	mis-triage rate from 1.2 to 0.9	0	Authors: Emergency Department, Electronic Engineering, Big Data and Clinical Research, Emergency Medicine,	0	0	0
	25	cGPS	A Web-Based Tool for Patient Triage in Emergency Department Settings: Validation Using the Emergency Severity Index.	Pierre Elias; Ash Damle; Michael Casale; Kim Branson; Chaitanya Churi; Ravi Komatireddy; Jamison Feramisco	2015	10.2196/medinform.3508	USA	USA	0	0	General triage	5-level triage scale	Ordinal (ranked categories e.g. MTS)	Human decision: Human is supposed to interpret the data and infer their own decision from it.	1	1	0	1	3	Static = both are passive as predictions are always shown (e.g., standard in patient overview)	not integrated yet - web application, plan to use API for integration	Recommendation (e.g., send patient to head scan in next 30 min)	0	0	0	0	Differential diagnoses, upstream and downstream possibilities (diagnoses) for differential diagnoses, symptom relief advice/medication	All Patients	0	1	0	1	1	1	0	0	patient’s demographics, clinical objective signs, subjective symptoms, vital signs, objective laboratory data, past medical history, and medications (note that laboratory data, past medical history, and medications are not required inputs in the triage setting)	1	Feasibility/ Prototype: Technical feasibility is tested, no users involved	95% same as ESI	0	0	0	Authors: Clinical Research, Health Science, Company	0	0	0
